# Supplementary material for: A barley UDP-glucosyltransferase inactivates nivalenol and provides Fusarium Head Blight resistance in transgenic wheat
Source: PubMed Central journal article supplement (PMC5447872; doi:10.1093/jxb/erx109), 2017-04-12
Supplement: erx109_suppl_supplementary_figures_S1_S3_Table_S1_S2.pdf [file erx109_suppl_supplementary_figures_S1_S3_Table_S1_S2.pdf]

**A barley UDP-glucosyltransferase inactivates nivalenol and provides Fusarium Head Blight resistance in transgenic wheat**

Xin Li , Herbert Michlmayr, Wolfgang Schweiger, Alexandra Malachova, Sanghyun Shin, Yadong Huang, Yanhong Dong, Gerlinde Wiesenberger, Susan McCormick, Marc Lemmens, Philipp Fruhmann, Christian Hametner, Franz Berthiller, Gerhard Adam, and Gary Muehlbauer

*Supplementary File*

**Fig. S1.** NMR data of NIV-3-*O*- $\beta$ -D-glucoside.  $^1\text{H}$ ,  $^{13}\text{C}$  and correlated spectra revealing NIV3G as the only product of NIV detoxification by OsUGT79 and HvUGT13248. All chemical shifts are displayed on the x-axis and are given in ppm relative to tetramethylsilane. The calibration was done using residual solvent signals methanol-*d*4). Multiplicities are abbreviated as s (singlet), d (doublet), t (triplet), q (quartet) and b (broad signal).

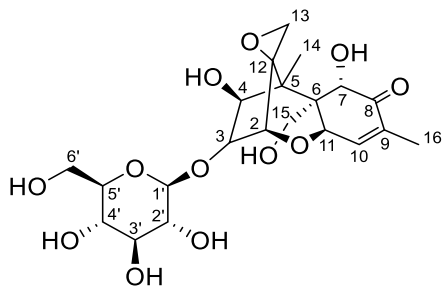

a)  $^1\text{H}$  spectrum of NIV-3- $\beta$ -D-glucoside

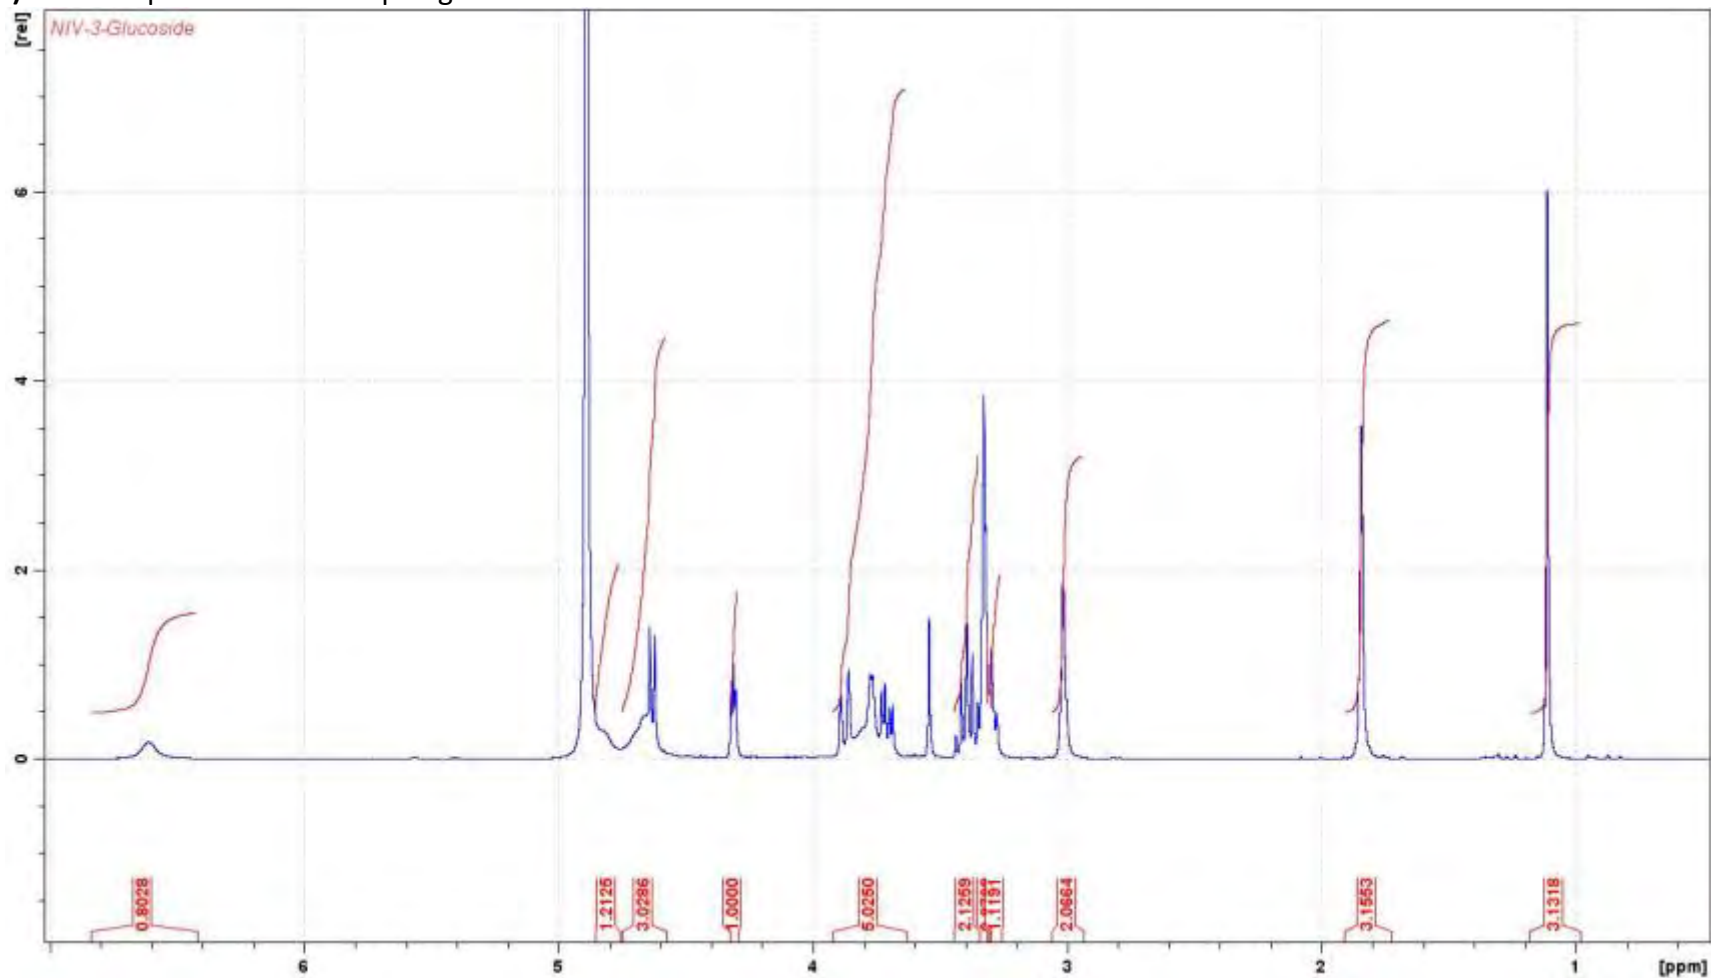

$^1\text{H}$  NMR (400 MHz, methanol- $d_4$ )  $\delta$  6.61 (b, 1H), 4.82 (b, 1H), 4.69 (b, 1H), 4.66 (b, 1H), 4.63 (d,  $J=7.6$  Hz, 1H), 4.31 (dd,  $J=4.5, 3.7$  Hz, 1H), 3.88 (dd,  $J=12.0, 2.1$  Hz, 1H), 3.77 (d,  $J=4.1$  Hz, 1H), 3.71 (dd,  $J=12.1, 5.0$  Hz, 1H), 3.70 – 3.90 (m, 2H), 3.40 (t,  $J=7.9$  Hz, 1H), 3.37 (t,  $J=8.5$  Hz, 1H), 3.31 (b, 1H), 3.29 (b, 1H), 3.02 (b, 2H), 1.84 (s, 3H), 1.11 (s, 3H)

b)  $^{13}\text{C}$  spectrum of NIV-3- $\beta$ -D-glucoside

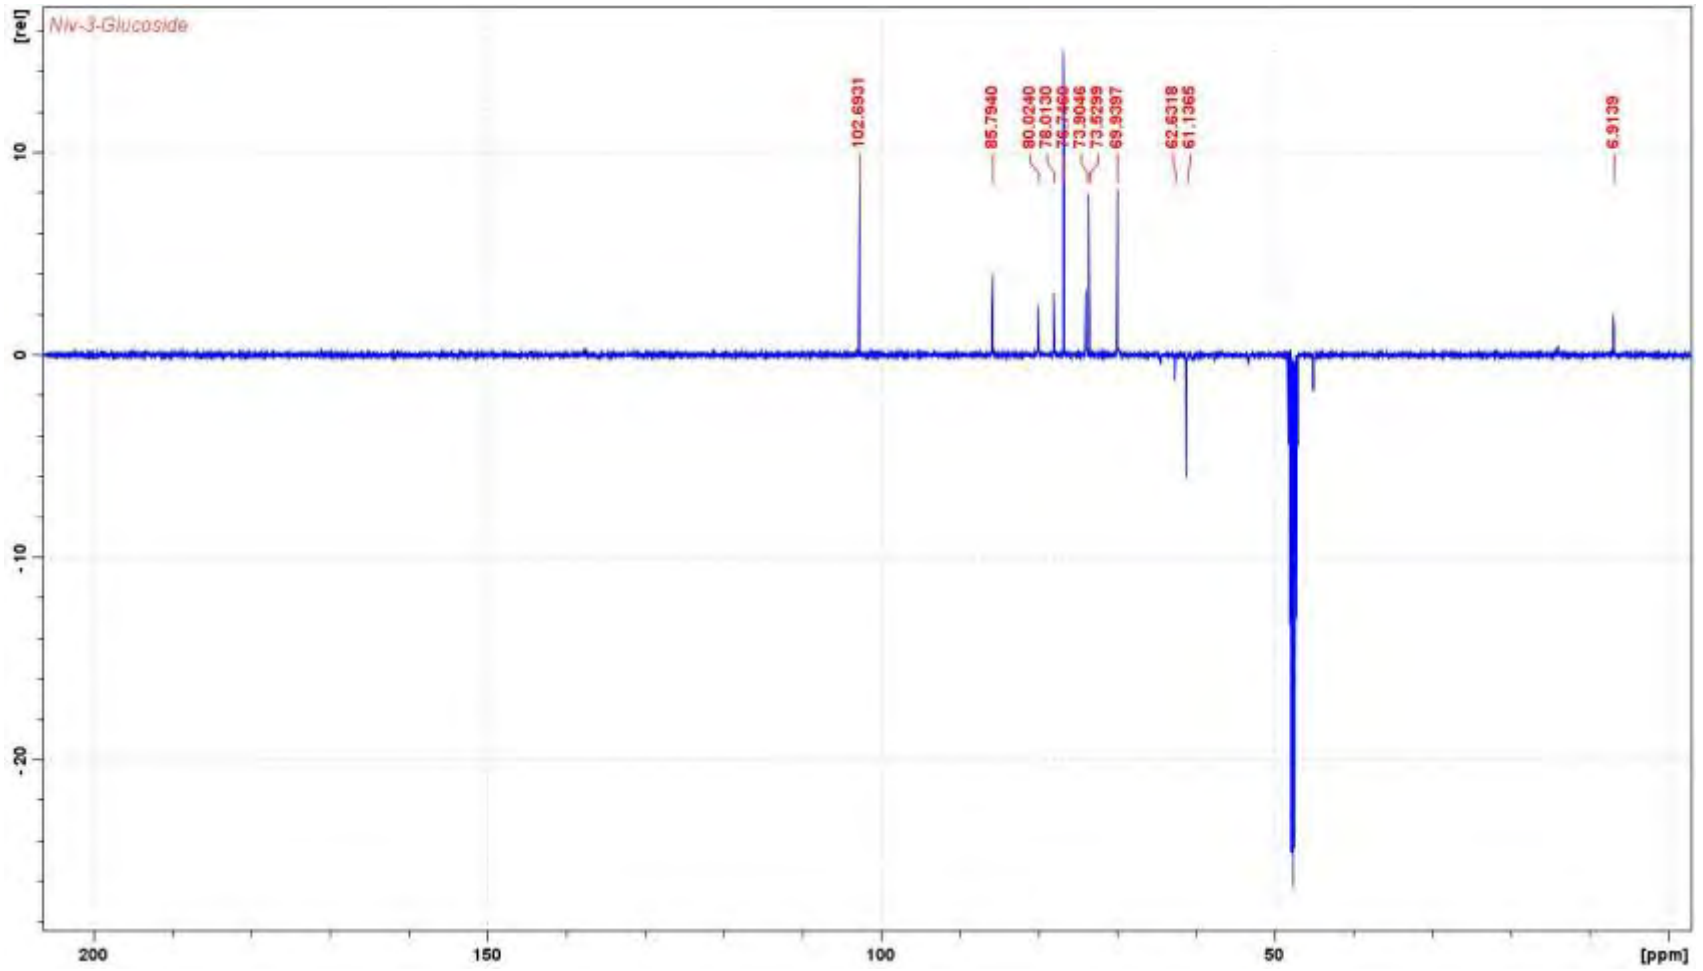

$^{13}\text{C}$  NMR (100 MHz, methanol- $d_4$ )  $\delta$  200.1 (s, 1C), 137.5 (d, 1C), 136.1 (s, 1C), 102.7 (d, 1C), 85.8 (d, 1C), 80.0 (d, 1C), 78.0 (d, 1C), 76.7 (d, 2C), 74.0 (d, 1C), 73.5 (d, 1C), 69.9 (d, 1C), 69.6 (d, 1C), 64.5 (s, 1C), 61.1 (t, 1C), 60.0 (t, 1C), 53.3 (s, 1C), 48.8 (s, 1C), 45.1 (t, 1C), 13.8 (q, 1C), 6.9 (q, 1C)

c) H-H-COSY spectrum of NIV-3- $\beta$ -D-glucoside

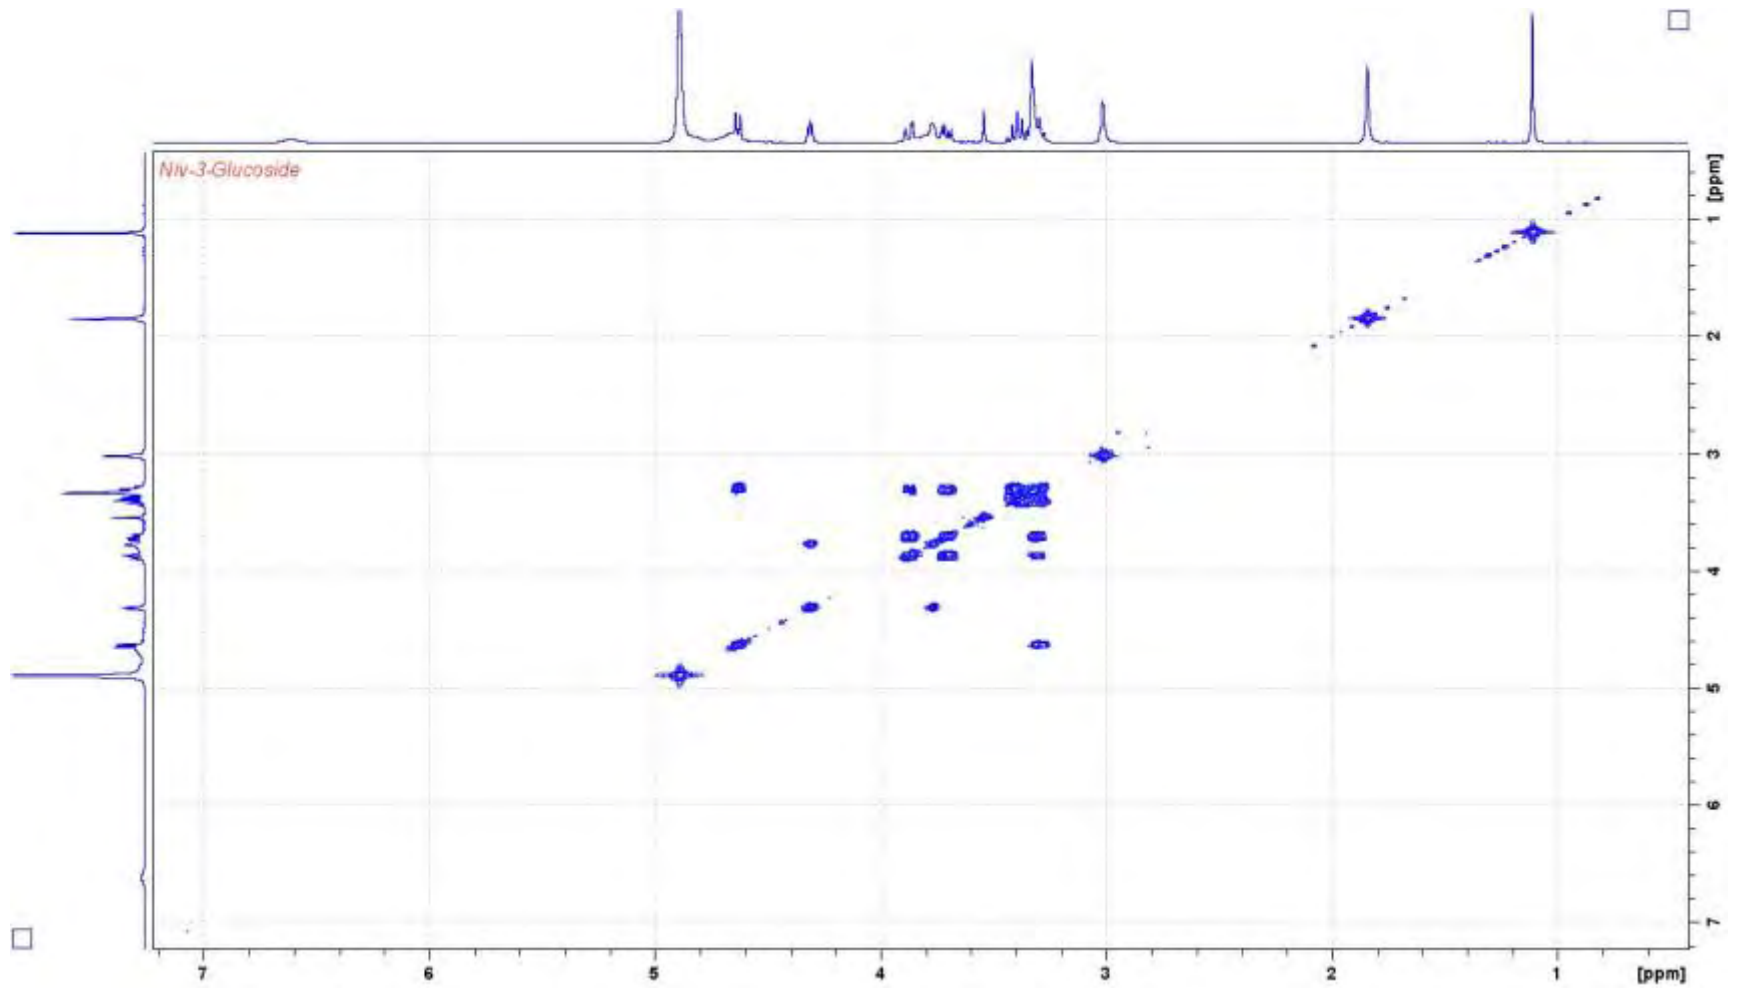

d) HSQC spectrum of NIV-3- $\beta$ -D-glucoside with  $^1\text{H}$  on the x-axis and  $^{13}\text{C}$  on the y-axis

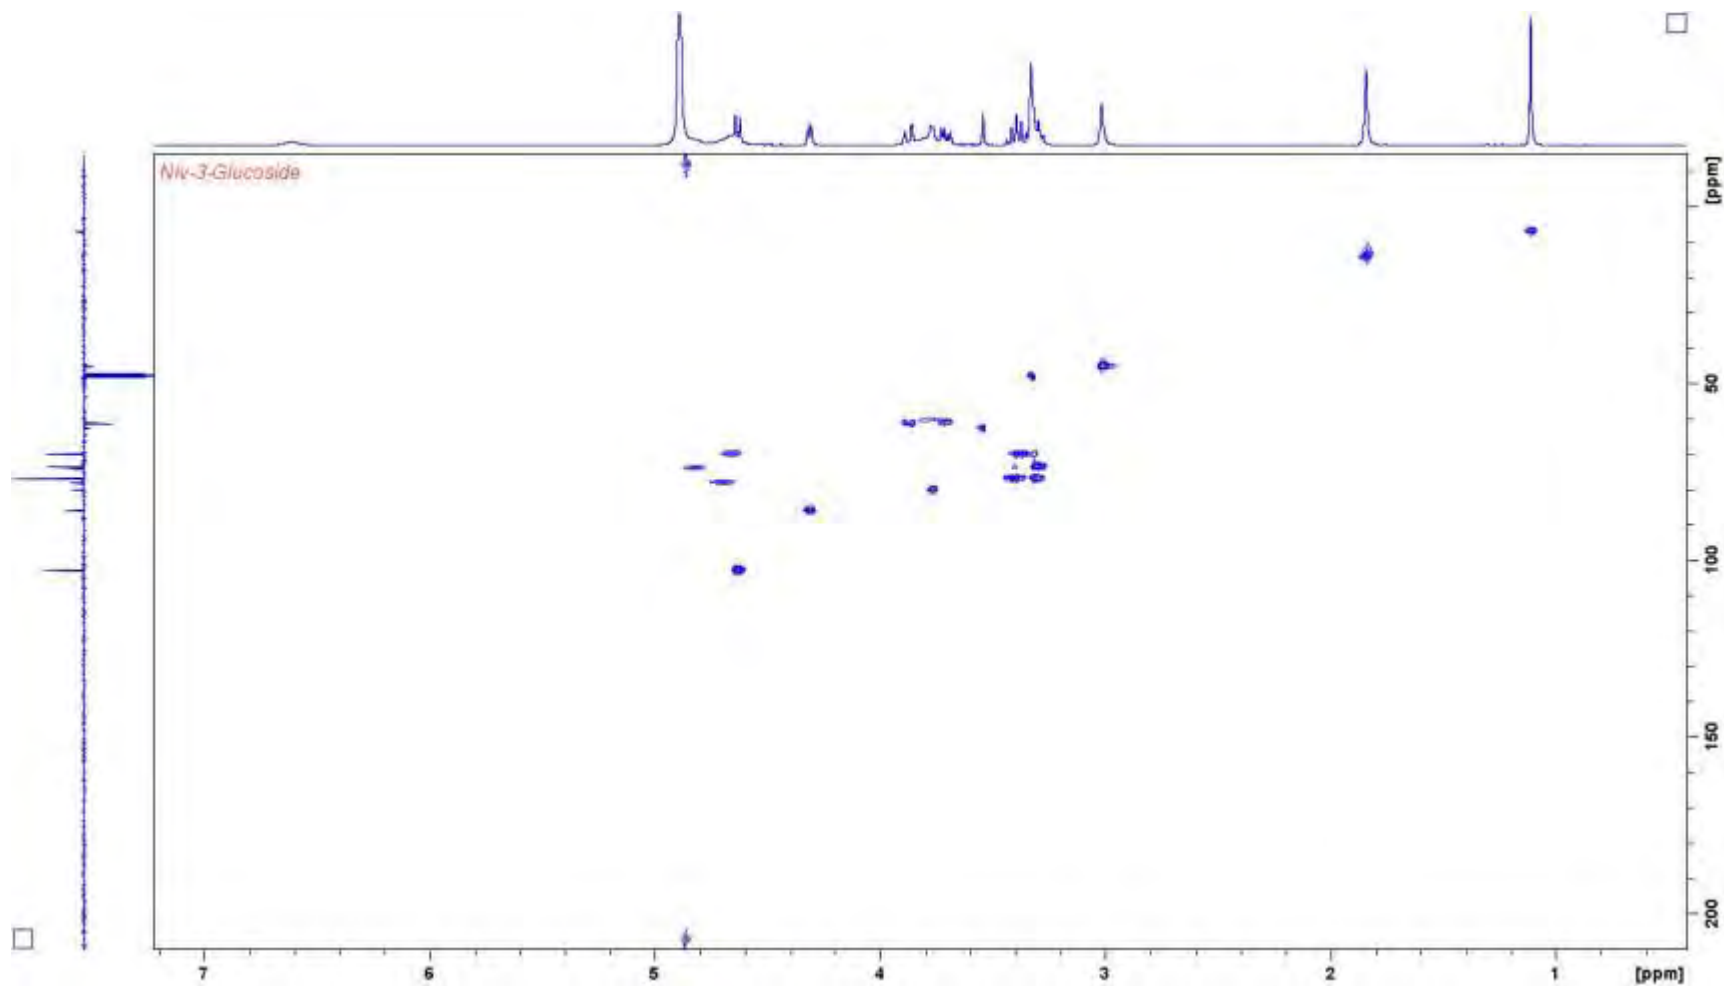

e) HMBC spectrum of NIV-3- $\beta$ -D-glucoside with  $^1\text{H}$  on the x-axis and  $^{13}\text{C}$  on the y-axis. The arrows indicate the connection between position 3 of DON and position 1' of glucose - red arrow = 85.8/4.63 ppm; blue arrow = 102.7/4.31 ppm.

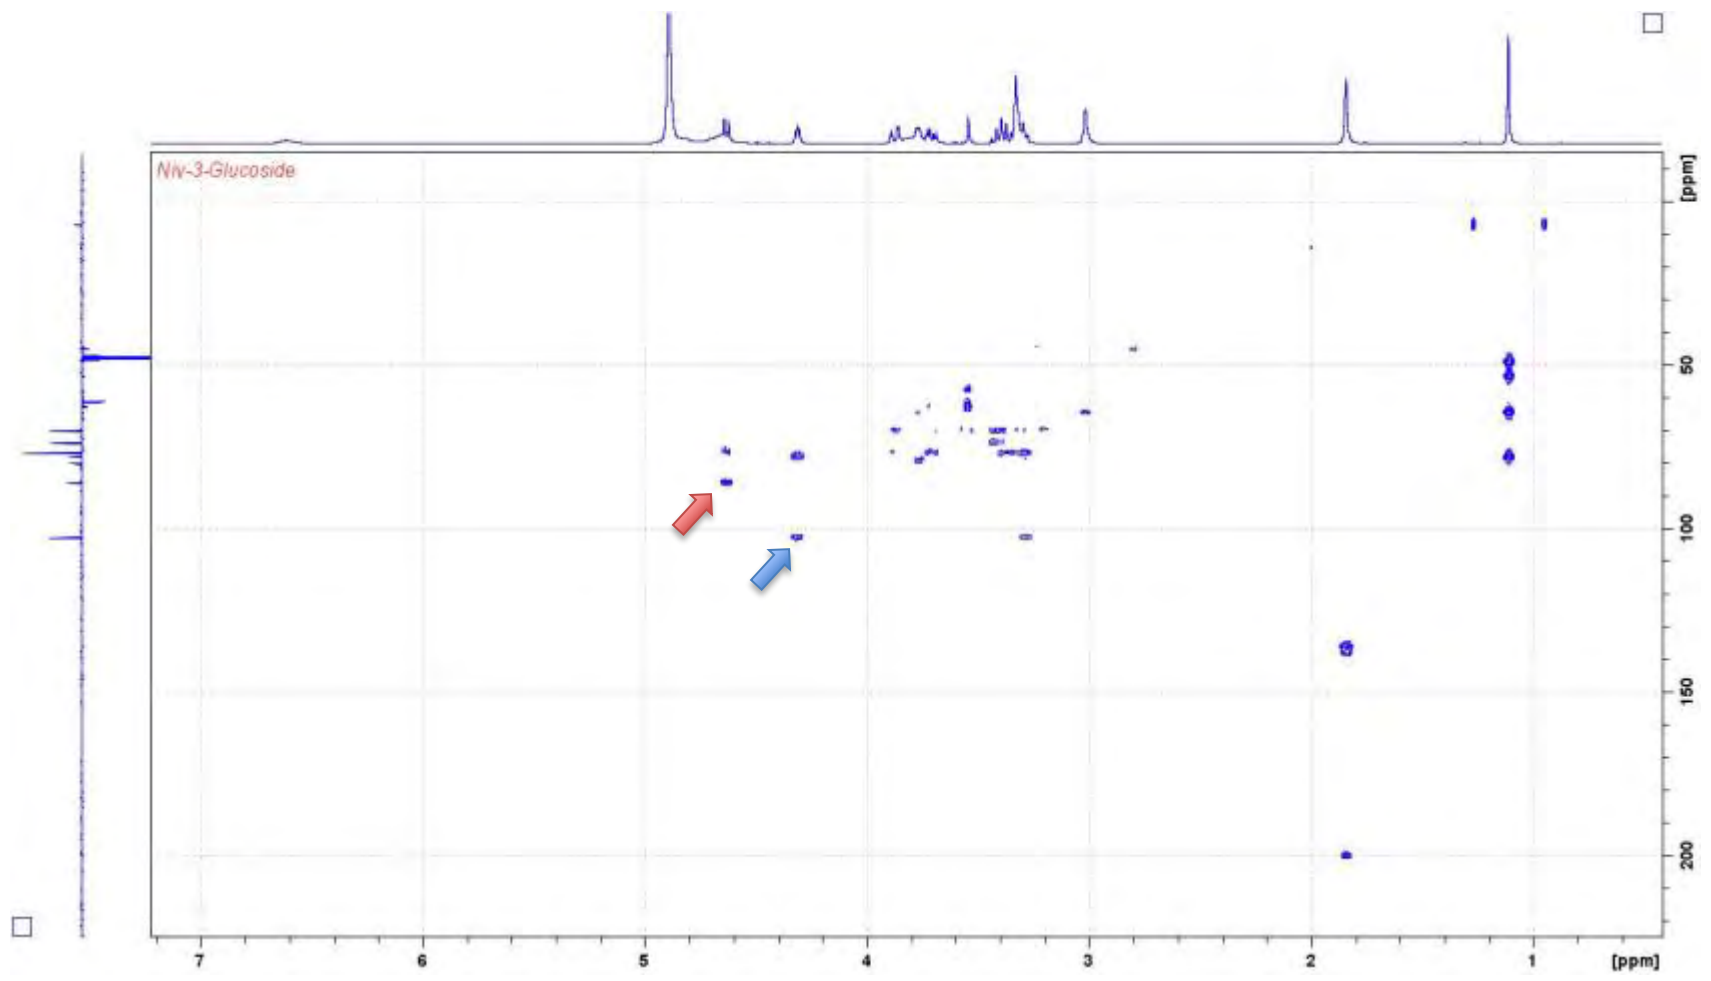



**Fig. S2.** NIV-3-glucoside is less inhibitory than NIV for rabbit reticulocyte ribosomes.

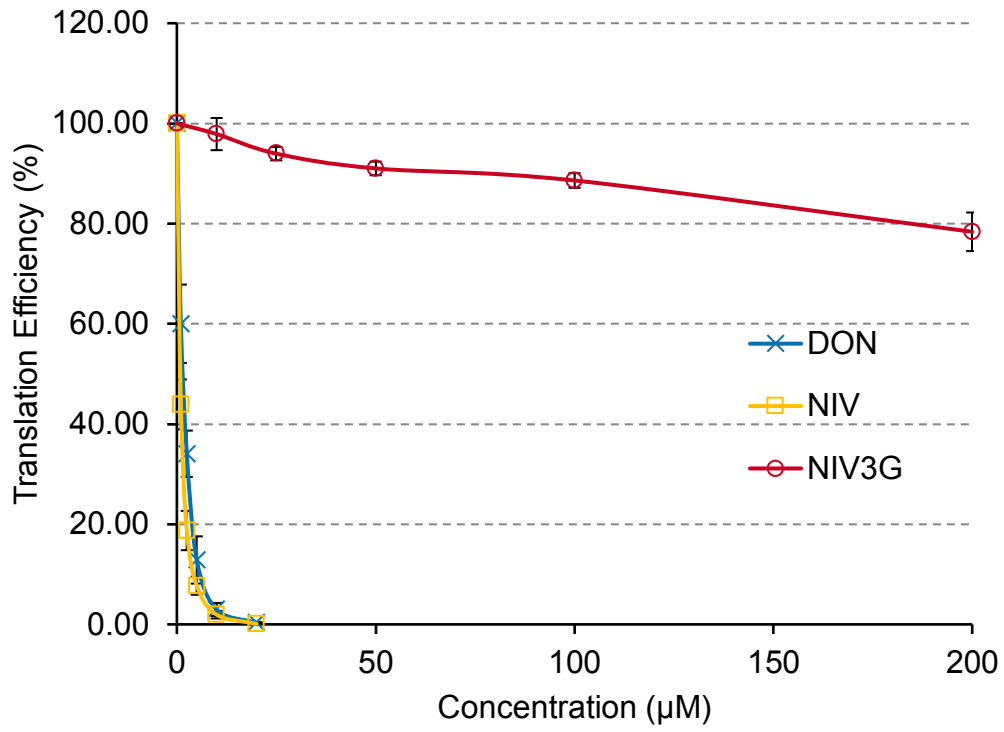

**Fig. S3.** Root growth of Col-0 wildtype and transgenic *A. thaliana* expressing *HvUGT13248* on half strength MS medium containing 0 mg L<sup>-1</sup> NIV at 7 days and 100 mg L<sup>-1</sup> NIV at 14 days after germination. Scale bars = 2 cm.

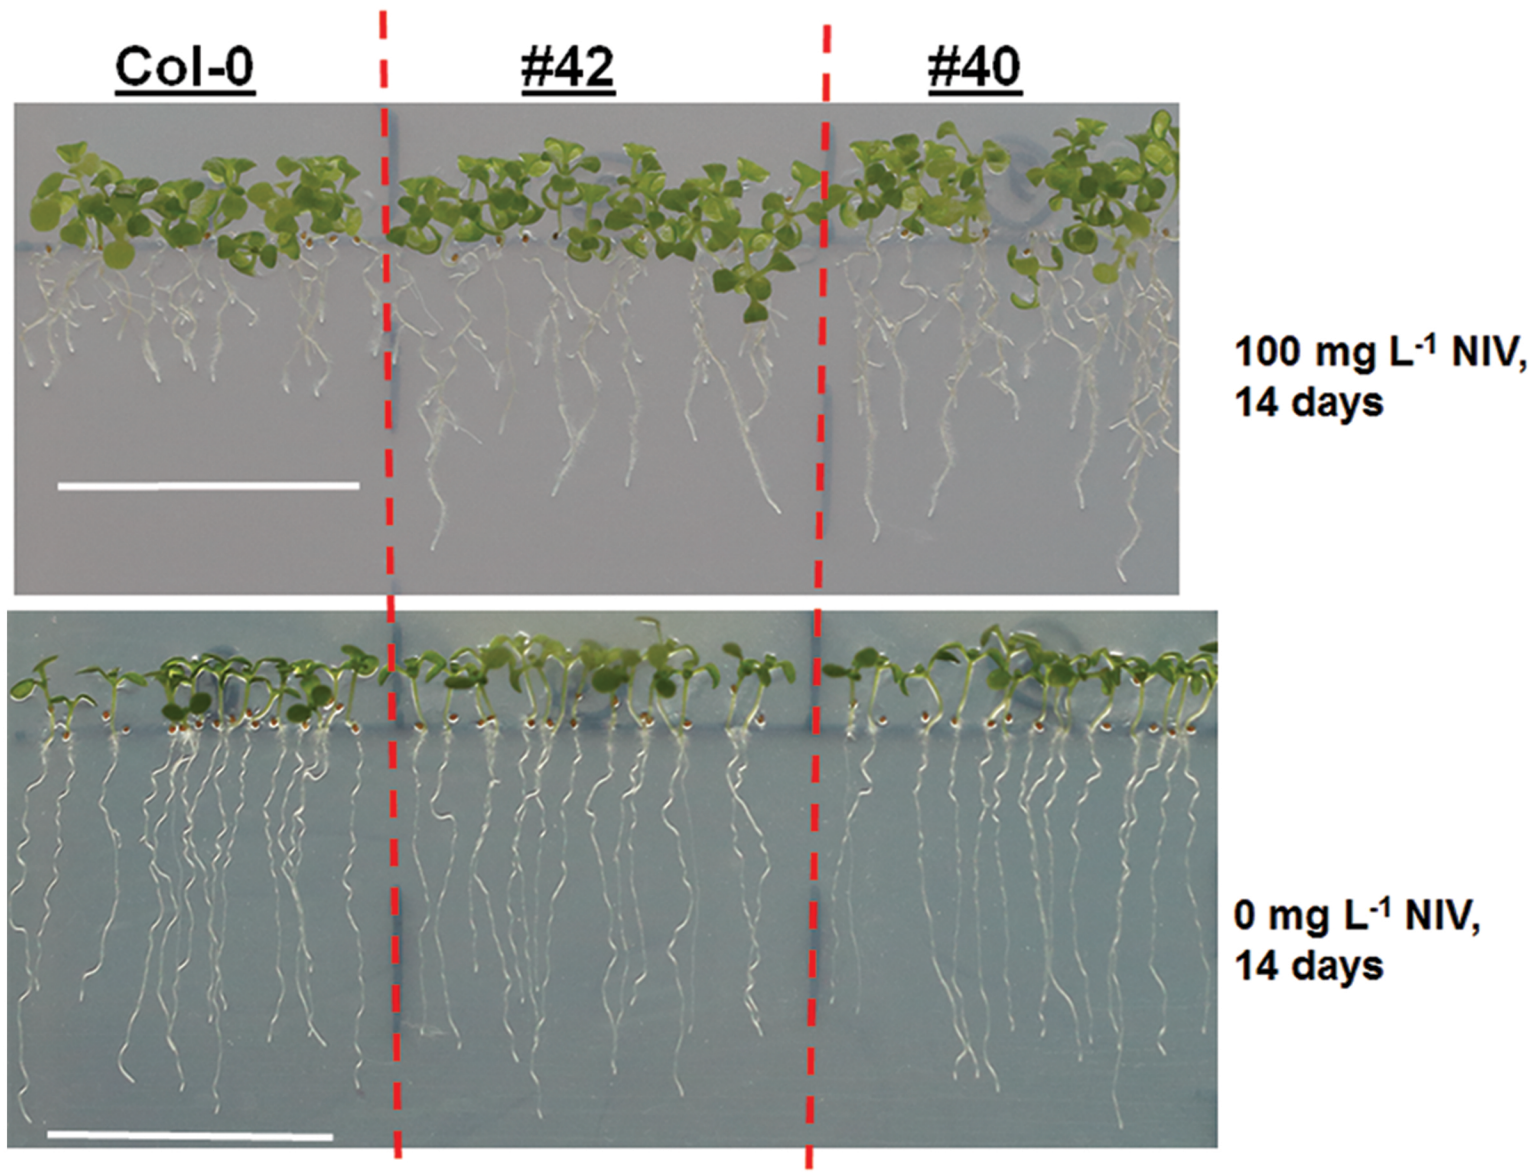

**Table S1.** Summary of transgenic wheat expressing *HvUGT13248* in greenhouse point-inoculation tests with NIV-producing *F. graminearum* strain.

| Genotype <sup>a</sup> | 2013 Spring      |                       |                       | 2013 Fall |               |          | 2014 Fall |               |          |
|-----------------------|------------------|-----------------------|-----------------------|-----------|---------------|----------|-----------|---------------|----------|
|                       | No. <sup>b</sup> | Sev. <sup>c</sup> (%) | Red. <sup>d</sup> (%) | No.       | Sev. (%)      | Red. (%) | No.       | Sev. (%)      | Red. (%) |
| #8                    | 31               | 8.2 ± 0.8***          | 75.4                  | 27        | 20.2 ± 4.0*** | 71.1     | 16        | 9.4 ± 0.9***  | 83.8     |
| #15                   | 32               | 6.8 ± 0.1***          | 79.5                  | 27        | 7.3 ± 0.1***  | 89.6     | 14        | 9.6 ± 1.1***  | 83.4     |
| #19                   | 20               | 6.7 ± 0.2***          | 79.9                  | 18        | 7.9 ± 0.5***  | 88.6     | 14        | 15.1 ± 2.6*** | 73.9     |
| #37                   | 31               | 6.9 ± 0.3***          | 79.3                  | 27        | 6.8 ± 0.1***  | 90.3     | 16        | 13.2 ± 1.9*** | 77.1     |
| Bobwhite              | 22               | 33.2 ± 6.6            | NA <sup>e</sup>       | 25        | 69.8 ± 5.0    | NA       | 16        | 57.7 ± 4.4    | NA       |
| Wheaton               | 23               | 58.6 ± 7.3            | NA                    | 20        | 82.9 ± 6.4    | NA       | 15        | 86.9 ± 5.2    | NA       |
| Sumai 3               | 22               | 8.0 ± 1.3             | NA                    | 18        | 7.0 ± 1.6     | NA       | 18        | 6.5 ± 0.6     | NA       |

<sup>a</sup>Events #8, #15, #19 and #37 were transgenic lines, and 'Bobwhite' was the non-transformed control. 'Sumai 3' was the resistant check, and 'Wheaton' was the susceptible check.

Values provided are the means ± standard error.

\*, \*\* and \*\*\* indicate significance at the 0.05, 0.01, and 0.001 levels compared with the non-transformed 'Bobwhite' control (Student's t test).

<sup>b</sup>No.: number of plants examined in the disease screen

<sup>c</sup>Sev.: FHB severity shown as the percentage of symptomatic spikelets in the inoculated spikes

<sup>d</sup>Red.: percent disease reduction rate as compared to the corresponding non-transformed 'Bobwhite' control.

<sup>e</sup>NA: not applicable.

**Table S2.** *HvUGT13248* converts NIV to NIV3G faster in transgenic wheat than in non-transformed 'Bobwhite'. Numbers shown are mean value  $\pm$  standard error. \*, \*\* and \*\*\* indicate significance at the 0.05, 0.01, and 0.001 levels compared with the non-transformed 'Bobwhite' control (Student's t test).

| Time <sup>a</sup><br>(h) | Non-transformed 'Bobwhite' |                  |                         |                               | <i>HvUGT13248</i> -#19 transgenic wheat |                     |                    |                    |
|--------------------------|----------------------------|------------------|-------------------------|-------------------------------|-----------------------------------------|---------------------|--------------------|--------------------|
|                          | NIV (nmol)                 | NIV3G (nmol)     | NIV3G/ NIV <sup>b</sup> | NIV+NIV3G <sup>c</sup> (nmol) | NIV (nmol)                              | NIV3G (nmol)        | NIV3G/ NIV         | NIV+NIV3G (nmol)   |
| 0                        | 106.69 $\pm$ 7.17          | 0                | 0                       | 106.69 $\pm$ 7.17             | 83.57 $\pm$ 5.82*                       | 0                   | 0                  | 83.57 $\pm$ 5.82*  |
| 2                        | 87.89 $\pm$ 3.40           | 0.44 $\pm$ 0.11  | 0.01 $\pm$ 0            | 88.39 $\pm$ 3.39              | 75.06 $\pm$ 3.13*                       | 2.52 $\pm$ 0.22***  | 0.03 $\pm$ 0***    | 77.58 $\pm$ 3.32*  |
| 6                        | 120.45 $\pm$ 6.18          | 5.02 $\pm$ 0.44  | 0.04 $\pm$ 0            | 125.47 $\pm$ 6.20             | 85.96 $\pm$ 5.85**                      | 19.20 $\pm$ 2.11*** | 0.22 $\pm$ 0.02*** | 105.16 $\pm$ 7.20  |
| 12                       | 66.92 $\pm$ 5.05           | 16.37 $\pm$ 0.77 | 0.26 $\pm$ 0.02         | 83.29 $\pm$ 5.22              | 70.35 $\pm$ 7.90                        | 23.41 $\pm$ 1.90**  | 0.36 $\pm$ 0.05    | 93.75 $\pm$ 7.91   |
| 24                       | 59.55 $\pm$ 8.95           | 24.24 $\pm$ 1.57 | 0.45 $\pm$ 0.04         | 83.79 $\pm$ 9.64              | 49.13 $\pm$ 4.13                        | 52.28 $\pm$ 2.97*** | 1.11 $\pm$ 0.09*** | 101.41 $\pm$ 5.84  |
| 36                       | 35.04 $\pm$ 2.55           | 47.53 $\pm$ 1.60 | 1.40 $\pm$ 0.09         | 82.56 $\pm$ 3.26              | 33.44 $\pm$ 3.33                        | 48.19 $\pm$ 3.44    | 1.59 $\pm$ 0.20    | 81.63 $\pm$ 2.60   |
| 48                       | 27.64 $\pm$ 4.62           | 53.62 $\pm$ 2.76 | 2.20 $\pm$ 0.24         | 81.26 $\pm$ 6.64              | 19.84 $\pm$ 2.29                        | 55.47 $\pm$ 2.19    | 3.10 $\pm$ 0.36    | 75.31 $\pm$ 2.33   |
| 72                       | 18.76 $\pm$ 2.22           | 51.34 $\pm$ 1.72 | 2.99 $\pm$ 0.32         | 70.10 $\pm$ 2.83              | 20.52 $\pm$ 2.42                        | 63.18 $\pm$ 2.49**  | 3.31 $\pm$ 0.29    | 74.40 $\pm$ 10.09* |
| 96                       | 15.58 $\pm$ 1.92           | 56.89 $\pm$ 3.61 | 3.91 $\pm$ 0.33         | 64.42 $\pm$ 9.23              | 10.45 $\pm$ 1.41*                       | 52.71 $\pm$ 3.13    | 6.24 $\pm$ 1.21    | 63.16 $\pm$ 3.31   |
| 336                      | 5.41 $\pm$ 0.89            | 61.75 $\pm$ 2.43 | 13.40 $\pm$ 1.87        | 59.70 $\pm$ 7.87              | 10.35 $\pm$ 1.83*                       | 64.12 $\pm$ 4.25    | 7.72 $\pm$ 1.30*   | 66.20 $\pm$ 9.47   |

<sup>a</sup>Time after NIV treatment when samples were collected.

<sup>b</sup>Ratio of NIV3G over NIV at each time point in each genotype.

<sup>c</sup>Sum of NIV3G and NIV at each time point in each genotype.
